# Supplementary material for: Evaluation of two fluorescence immunoassays for the rapid detection of SARS-CoV-2 antigen—new tool to detect infective COVID-19 patients
Source: PeerJ. 2021 Jan 21;9:e10801. doi: 10.7717/peerj.10801 (PMC7827970; doi:10.7717/peerj.10801)
Supplement: Supplemental Information 1 [file peerj-09-10801-s001.xlsx]

## Sheet: DATA
N°	Sex	Age (years)	Date of symptom onset	Date of sampling	Days symptom onset to sampling	PCR result	CT	SD Biosensor result	COI	SD Biosensor repetition	COI Repetition	SD BIOS Final result	SOFIA 2 result	SOFIA 2 repetition	SOFIA 2 Final result
1	M	38	2020-03-19	2020-03-21	2	1	17.401	1	86.38			1	1		1
2	M	40	2020-04-24	2020-04-26	2	1	16.24	1	77.45			1	1		1
3	F	45	2020-04-23	2020-04-26	3	1	17.51	1	83.93			1	1		1
4	M	57	2020-05-26	2020-05-31	5	1	30.89	0	0.54	0	0.54	0	0	0	0
5	M	50	2020-05-11	2020-05-13	2	1	16.02	1	41.59			1	1		1
6	F	38	2020-05-08	2020-05-13	5	1	16.54	1	76.97			1	1		1
7	F	38	2020-05-12	2020-05-13	1	1	16.94	1	42.39			1	1		1
8	F	22	2020-05-11	2020-05-13	2	1	16.42	1	85.37			1	1		1
9	M	65	2020-06-27	2020-07-02	5	1	32.57	0	0.48	0	0.25	0	0	1	1
10	F	37	2020-04-20	2020-04-21	1	1	16.79	1	85.11			1	1		1
11	M	38	2020-03-17	2020-03-18	1	1	14.12	1	87.54			1	1		1
12	M	54	2020-03-17	2020-03-18	1	1	12.057	1	86.67			1	1		1
13	F	37	2020-04-22	2020-04-23	1	1	19.05	1	80.98			1	1		1
14	M	59	2020-04-19	2020-04-22	3	1	16.81	1	85.74			1	1		1
15	F	47	2020-04-24	2020-04-25	1	1	16.32	1	85.44			1	1		1
16	M	49	2020-04-23	2020-04-25	2	1	18.3	1	88.04			1	1		1
17	M	63	2020-04-24	2020-04-25	1	1	17.61	1	86.75			1	1		1
18	M	37	2020-03-15	2020-03-18	3	1	14.667	1	46.21			1	1		1
19	M	39	2020-03-16	2020-03-18	2	1	10.745	1	86.74			1	1		1
20	M	80	2020-04-01	2020-04-03	2	1	13.75	1	87.43			1	1		1
21	F	38	2020-04-02	2020-04-04	2	1	22.74	1	30.24			1	1		1
22	M	81	2020-04-03	2020-04-07	4	1	22.35	1	64.29			1	1		1
23	F	26	2020-04-07	2020-04-10	3	1	20.23	1	57.87			1	1		1
24	F	38	2020-04-10	2020-04-11	1	1	18.68	1	79.09			1	1		1
25	F	91	2020-04-10	2020-04-11	1	1	24.22	1	13.82			1	1		1
26	F	28	2020-04-15	2020-04-16	1	1	26.89	1	6.51			1	1		1
27	M	31	2020-04-18	2020-04-19	1	1	23.65	1	68.11			1	1		1
28	M	35	2020-04-18	2020-04-19	1	1	21.07	1	22.42			1	1		1
29	M	40	2020-04-15	2020-04-19	4	1	21.05	1	8.42			1	1		1
30	F	26	2020-04-16	2020-04-19	3	1	21.02	1	17.2			1	1		1
31	M	39	2020-08-09	2020-08-13	4	1	31.77	1	0.45			0	0		0
32	F	14	2020-04-06	2020-04-11	5	1	29.04	1	3.39			1	1		1
33	M	31	2020-03-31	2020-04-01	1	0	N/A	1	1.33	0	0.41	0	0		0
34	F	57	2020-03-31	2020-04-04	4	0	N/A	0	0.67			0	0		0
35	M	74	2020-04-04	2020-04-04	0	0	N/A	0	0.49			0	0		0
36	F	0	2020-04-04	2020-04-05	1	0	N/A	0	0.27			0	0		0
37	M	30	2020-04-08	2020-04-08	0	0	N/A	0	0.26			0	0		0
38	F	34	2020-04-08	2020-04-09	1	0	N/A	0	0.35			0	0		0
39	F	31	2020-04-02	2020-04-09	7	0	N/A	0	0.57			0	0		0
40	F	10	2020-04-05	2020-04-09	4	0	N/A	0	0.51			0	0		0
41	M	90	2020-04-13	2020-04-14	1	0	N/A	0	0.9			0	0		0
42	F	68	2020-04-15	2020-04-16	1	0	N/A	0	0.57			0	0		0
43	F	40	2020-04-14	2020-04-16	2	0	N/A	0	0.2			0	0		0
44	F	89	2020-04-16	2020-04-16	0	0	N/A	0	0.38			0	1	1	1
45	M	72	2020-04-15	2020-04-16	1	0	N/A	0	0.74			0	0		0
46	M	50	2020-04-10	2020-04-17	7	0	N/A	0	0.15			0	0		0
47	F	38	2020-04-17	2020-04-17	0	0	N/A	0	0.65			0	0		0
48	M	51	2020-04-16	2020-04-17	1	0	N/A	0	0.71			0	0		0
49	F	62	2020-04-12	2020-04-17	5	0	N/A	1	3.33	1	2.22	1	0		0
50	F	37	2020-03-27	2020-04-18	21	0	N/A	0	0.87			0	0		0
51	M	47	2020-04-19	2020-04-19	0	0	N/A	0	0.29			0	0		0
52	M	40	2020-04-17	2020-04-20	3	0	N/A	0	0.88			0	0		0
53	F	40	PRE-SURGERY ASYMPTOMATIC	2020-08-11	N/A	0	N/A	0	0.49			0	0		0
54	F	35	PRE-SURGERY ASYMPTOMATIC	2020-08-11	N/A	0	N/A	0	0.59			0	0		0
55	F	39	PRE-SURGERY ASYMPTOMATIC	2020-08-11	N/A	0	N/A	0	0.7			0	0		0
56	M	69	PRE-SURGERY ASYMPTOMATIC	2020-08-11	N/A	0	N/A	0	0.08			0	0		0
57	M	37	PRE-SURGERY ASYMPTOMATIC	2020-08-11	N/A	0	N/A	0	0.54			0	0		0
58	M	31	PRE-SURGERY ASYMPTOMATIC	2020-08-11	N/A	0	N/A	0	0.73			0	0		0
59	M	38	PRE-SURGERY ASYMPTOMATIC	2020-08-11	N/A	0	N/A	0	0.38			0	0		0
60	F	67	PRE-SURGERY ASYMPTOMATIC	2020-08-11	N/A	0	N/A	0	0.65			0	0		0
61	M	27	PRE-SURGERY ASYMPTOMATIC	2020-08-11	N/A	0	N/A	0	0.27			0	0		0
62	F	79	PRE-SURGERY ASYMPTOMATIC	2020-08-10	N/A	0	N/A	0	0.44			0	0		0
63	F	48	PRE-SURGERY ASYMPTOMATIC	2020-08-11	N/A	0	N/A	0	0.22			0	0		0
64	M	39	PRE-SURGERY ASYMPTOMATIC	2020-08-11	N/A	0	N/A	0	0.51			0	0		0
N/A: non-applicable
